# Supplementary material
Source: Springer Nature journal article supplement (https://www.springermedizin.de/resource/supplementary/12967_2013_1651_MOESM5_ESM.pdf/9574552)

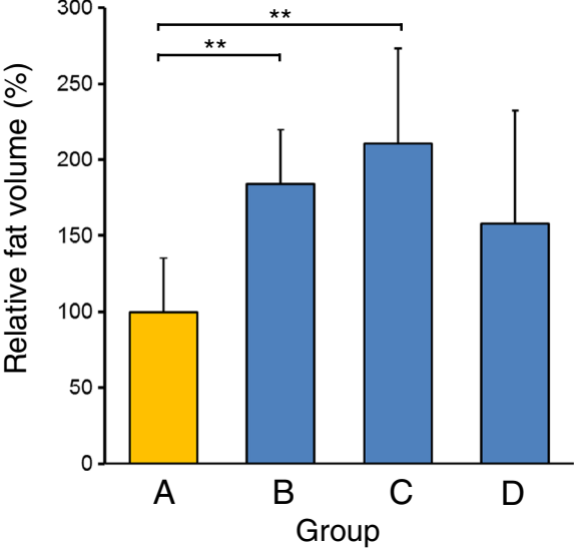

Supplement: MOESM5 [file 9574552]
